# Supplementary material for: Incarviatone A, a structurally unique natural product hybrid with a new carbon skeleton from Incarvillea delavayi, and its absolute configuration via calculated electronic circular dichroic spectra
Source: Royal Society of Chemistry journal article supplement (doi:10.1039/c2ra20188g), 2012-01-01
Supplement: c2ra20188g.pdf [file c2ra20188g.pdf]

## Supplementary Information

**Incarviate A, a structurally unique natural product hybrid with a new carbon skeleton from *Incarvillea delavayi*, and its absolute configuration via calculated electronic circular dichroic spectra†**

**Yun-Heng Shen,<sup>a</sup> Yuanqing Ding,<sup>\*b</sup> Tao Lu,<sup>a</sup> Xing-Cong Li,<sup>b,c</sup> Jun-Mian Tian,<sup>a</sup> Hui-Liang Li,<sup>a</sup> Lei Shan,<sup>a</sup> Daneel Ferreira,<sup>b,c</sup> Ikhlas A. Khan,<sup>b,c</sup> Wei-Dong Zhang<sup>\*a,d</sup>**

Email: [wdzhangy@hotmail.com](mailto:wdzhangy@hotmail.com); [yqding@olemiss.edu](mailto:yqding@olemiss.edu)

<sup>a</sup> *Department of Phytochemistry, School of Pharmacy, Second Military Medical University, 325 Guohe Road, Shanghai 200433, PR China. Fax: +86-21-81871244; Tel: +86-21-81871244; E-mail: [wdzhangy@hotmail.com](mailto:wdzhangy@hotmail.com)*

<sup>b</sup> *National Center for Natural Products Research, Research Institute of Pharmaceutical Sciences, School of Pharmacy, the University of Mississippi, University, MS 38677 USA. Fax: +1-662-9157989; Tel: +1-662-9151027; E-mail: [yqding@olemiss.edu](mailto:yqding@olemiss.edu)*

<sup>c</sup> *Department of Pharmacognosy, School of Pharmacy, the University of Mississippi, University, MS 38677 USA.*

<sup>d</sup> *School of Pharmacy, Shanghai Jiao Tong University, Shanghai 200030, P. R. China*

## Contents

### NMR spectra and other data

**Figure S1** The structure of cleroidicin F

**Figure S2** Experimental CD spectrum of incarviateone A (**1**)

**Figure S3** 150 MHz  $^{13}\text{C}$  and DEPT NMR Spectra of incarviateone A (**1**) in  $\text{CDCl}_3$

**Figure S4** 600 MHz  $^1\text{H}$  NMR Spectrum of incarviateone A (**1**) in  $\text{CDCl}_3$

**Figure S5** HSQC NMR Spectrum of incarviateone A (**1**) in  $\text{CDCl}_3$

**Figure S6**  $^1\text{H}$ - $^1\text{H}$  COSY NMR Spectrum of incarviateone A (**1**) in  $\text{CDCl}_3$

**Figure S7** HMBC NMR Spectrum of incarviateone A (**1**) in  $\text{CDCl}_3$

**Figure S8** NOESY NMR Spectrum of incarviateone A (**1**) in  $\text{CDCl}_3$

### Computational Data

#### Complete citation of reference 19

**Figure S9** Calculated ECD spectra of individual conformer of **1a-1h**

**Figure S10** Optimized geometries of predominant conformers of **2S-1** in the gas phase

**Figure S11** Calculated ECD spectra of individual conformer of **2S-1** at the B3LYP/6-31G\*\* level in the gas phase.

**Table S1** Important dihedral angles of optimized conformers of **1** in the gas phase at the B3LYP/6-31G\*\* level

**Table S2** Conformational analysis of **1**

**Table S3.** Important Thermodynamic Parameters of **1** (au)

**Table S4** Key transitions and their related rotatory and oscillator strengths of conformer **1e** at the B3LYP/6-31G\*\* level in the gas phase

**Table S5** Conformational analysis of **2S-1**

**Table S6** Important Thermodynamic Parameters of **2S-1** (au)

**Table S7** Important dihedral angles of optimized conformers of **2S-1** in the gas phase at B3LYP/6-31G\*\* level

**Figure S1** The structure of clerindicin F

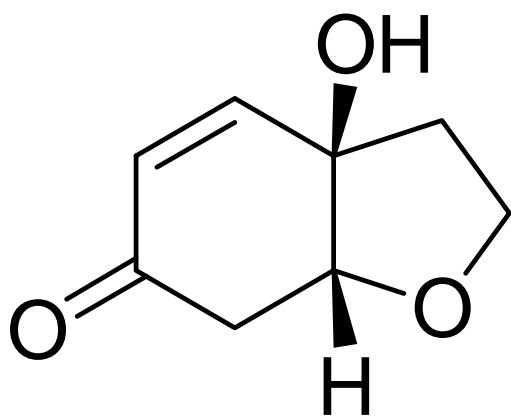

Figure S2 Experimental CD spectrum of incarvatonone A (1)

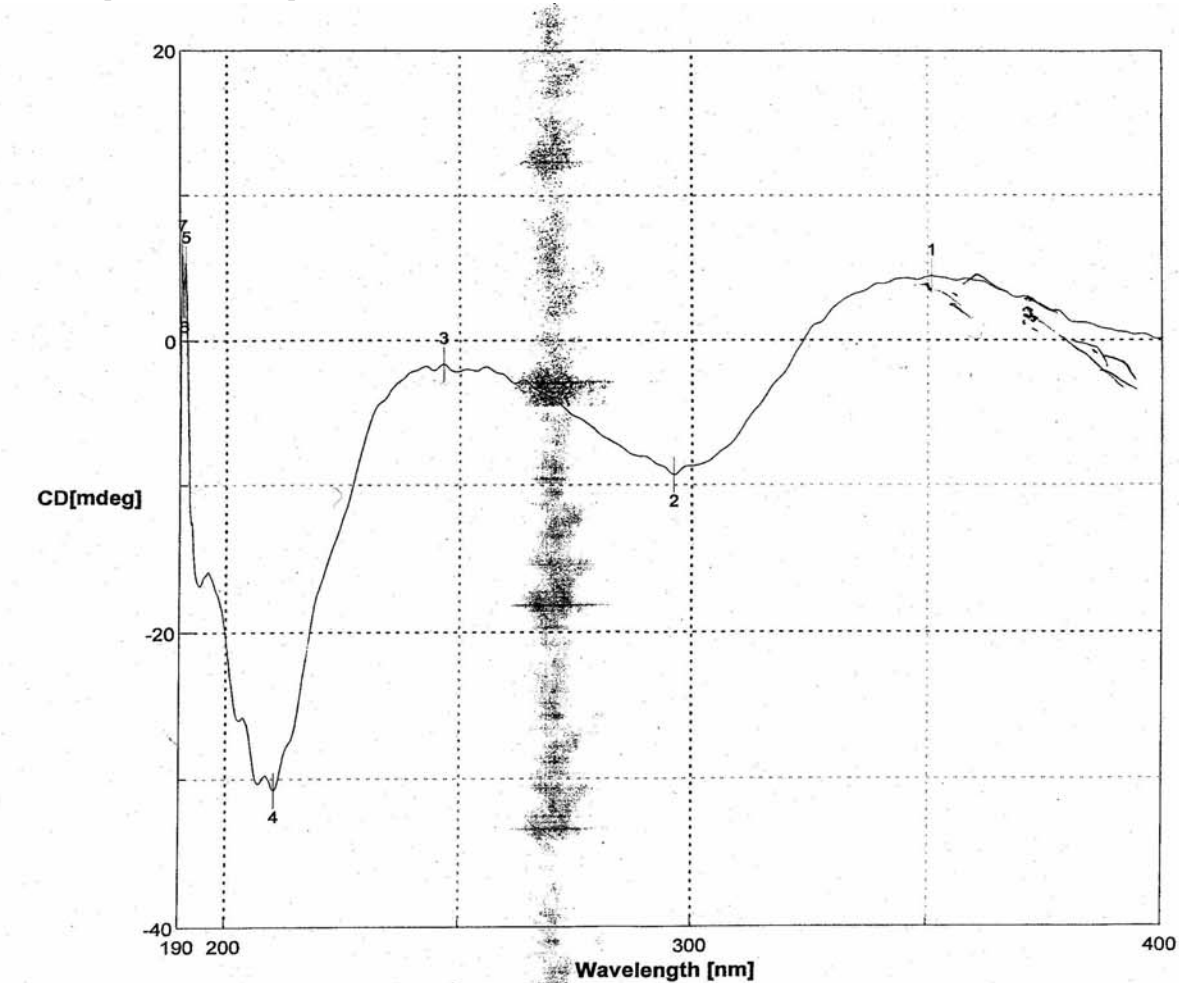

Date/Time 10/18/07 10:41AM  
Operator feng  
File Name LID-22 s  
Sample Name LID-22  
Comment

| No. | nm    | CD[mdeg] | No. | nm    | CD[mdeg] | No. | nm    | CD[mdeg] |
|-----|-------|----------|-----|-------|----------|-----|-------|----------|
| 1   | 350.9 | 4.39227  | 2   | 296.2 | -9.29192 | 3   | 246.5 | -1.65228 |
| 4   | 210.4 | -30.7474 | 5   | 191.3 | 5.31832  | 6   | 190.9 | 2.77369  |
| 7   | 190.6 | 6.10821  |     |       |          |     |       |          |

Figure S3 150 MHz <sup>13</sup>C and DEPT NMR Spectra of incarviateone A (1) in CDCl<sub>3</sub>

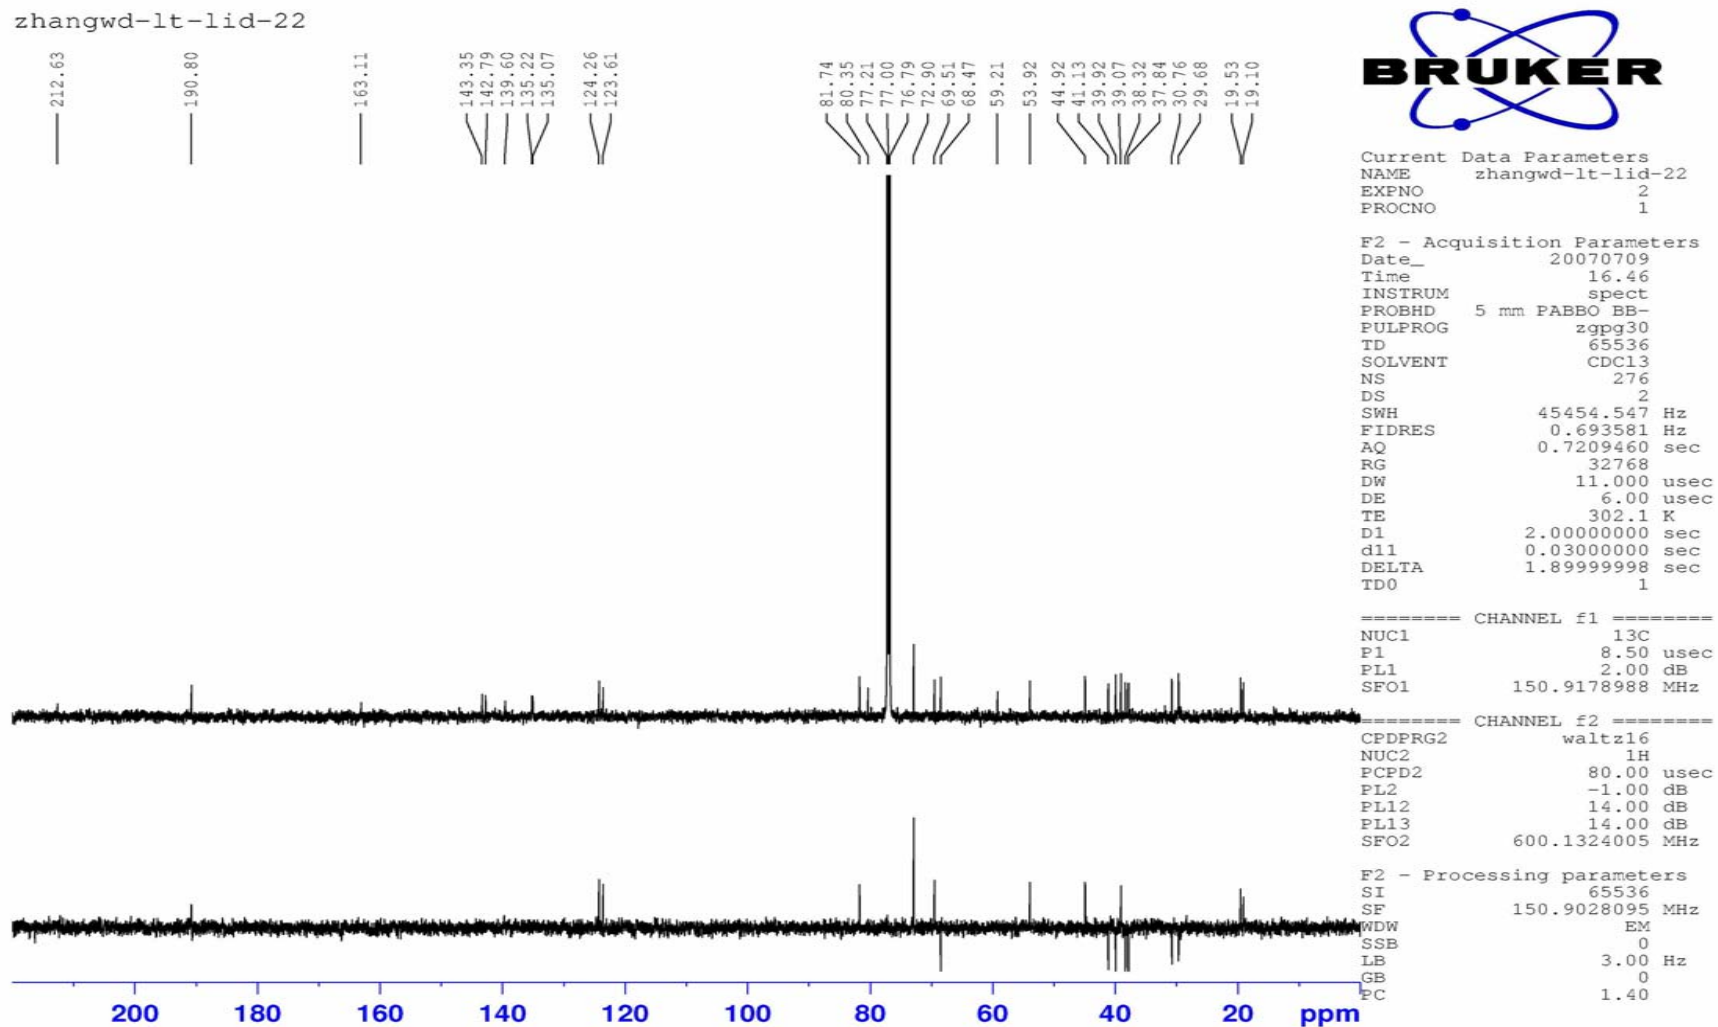

Figure S4 600 MHz  $^1\text{H}$  NMR Spectrum of incarviateone A (**1**) in  $\text{CDCl}_3$

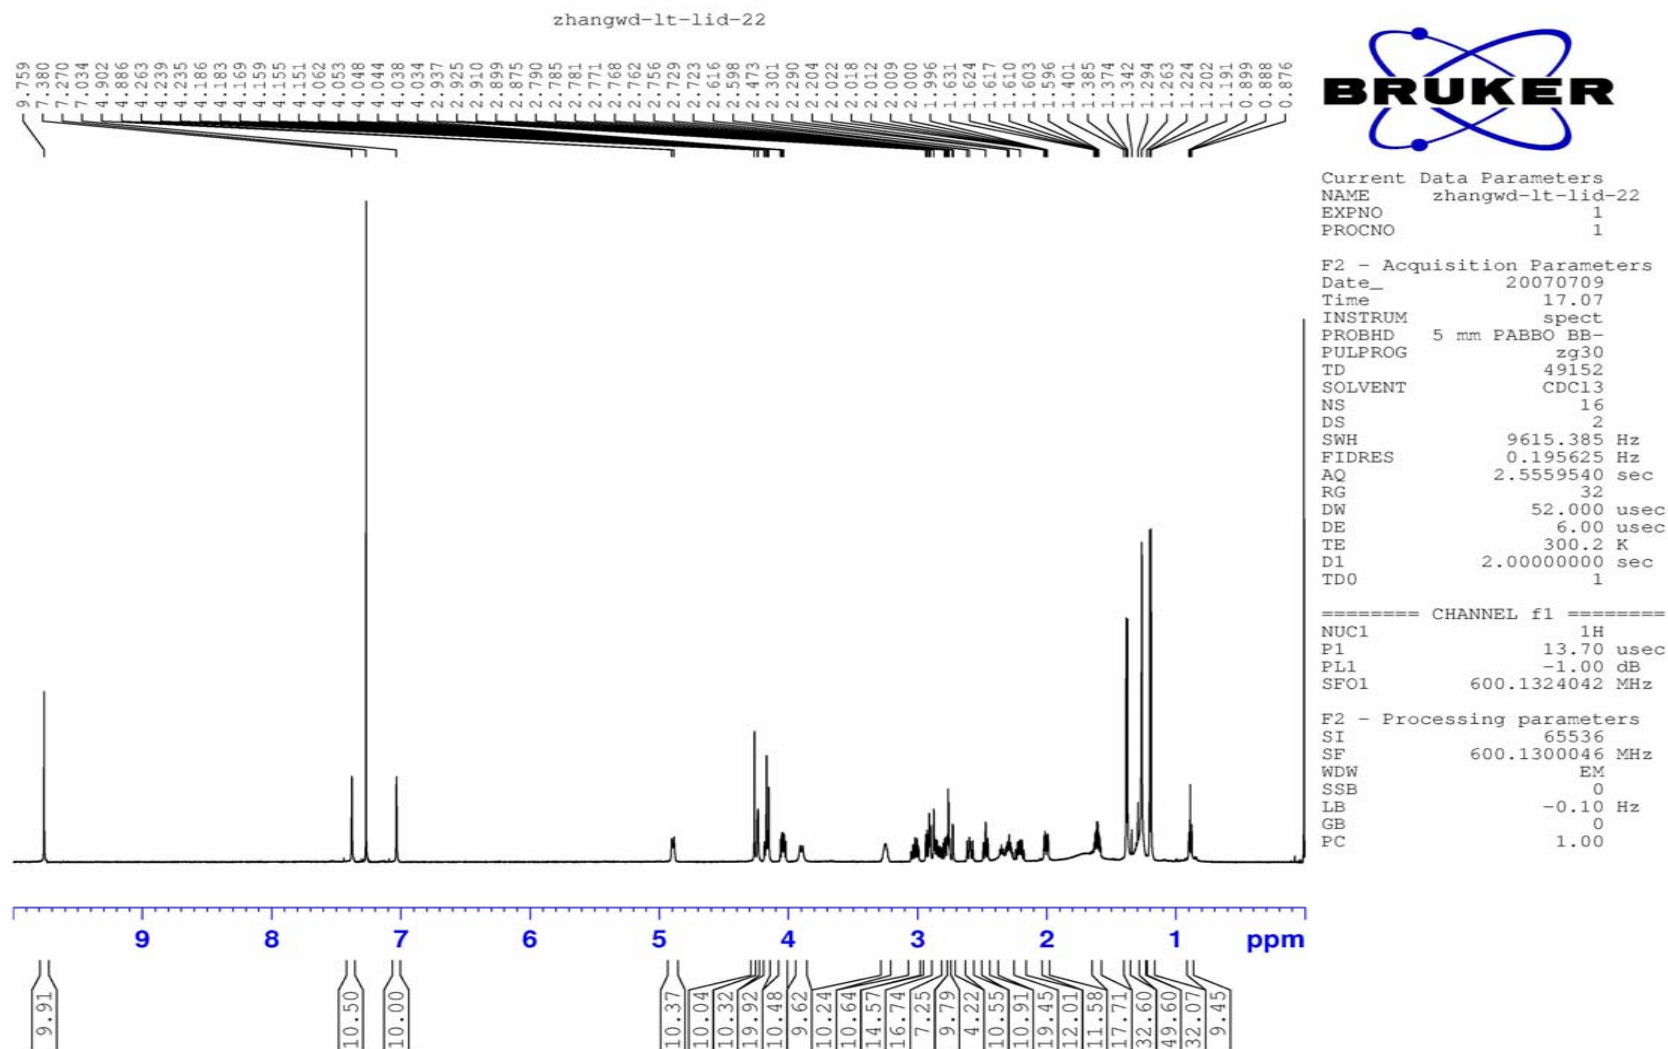

Figure S5 HSQC NMR Spectrum of incarviateone A (1) in CDCl<sub>3</sub>

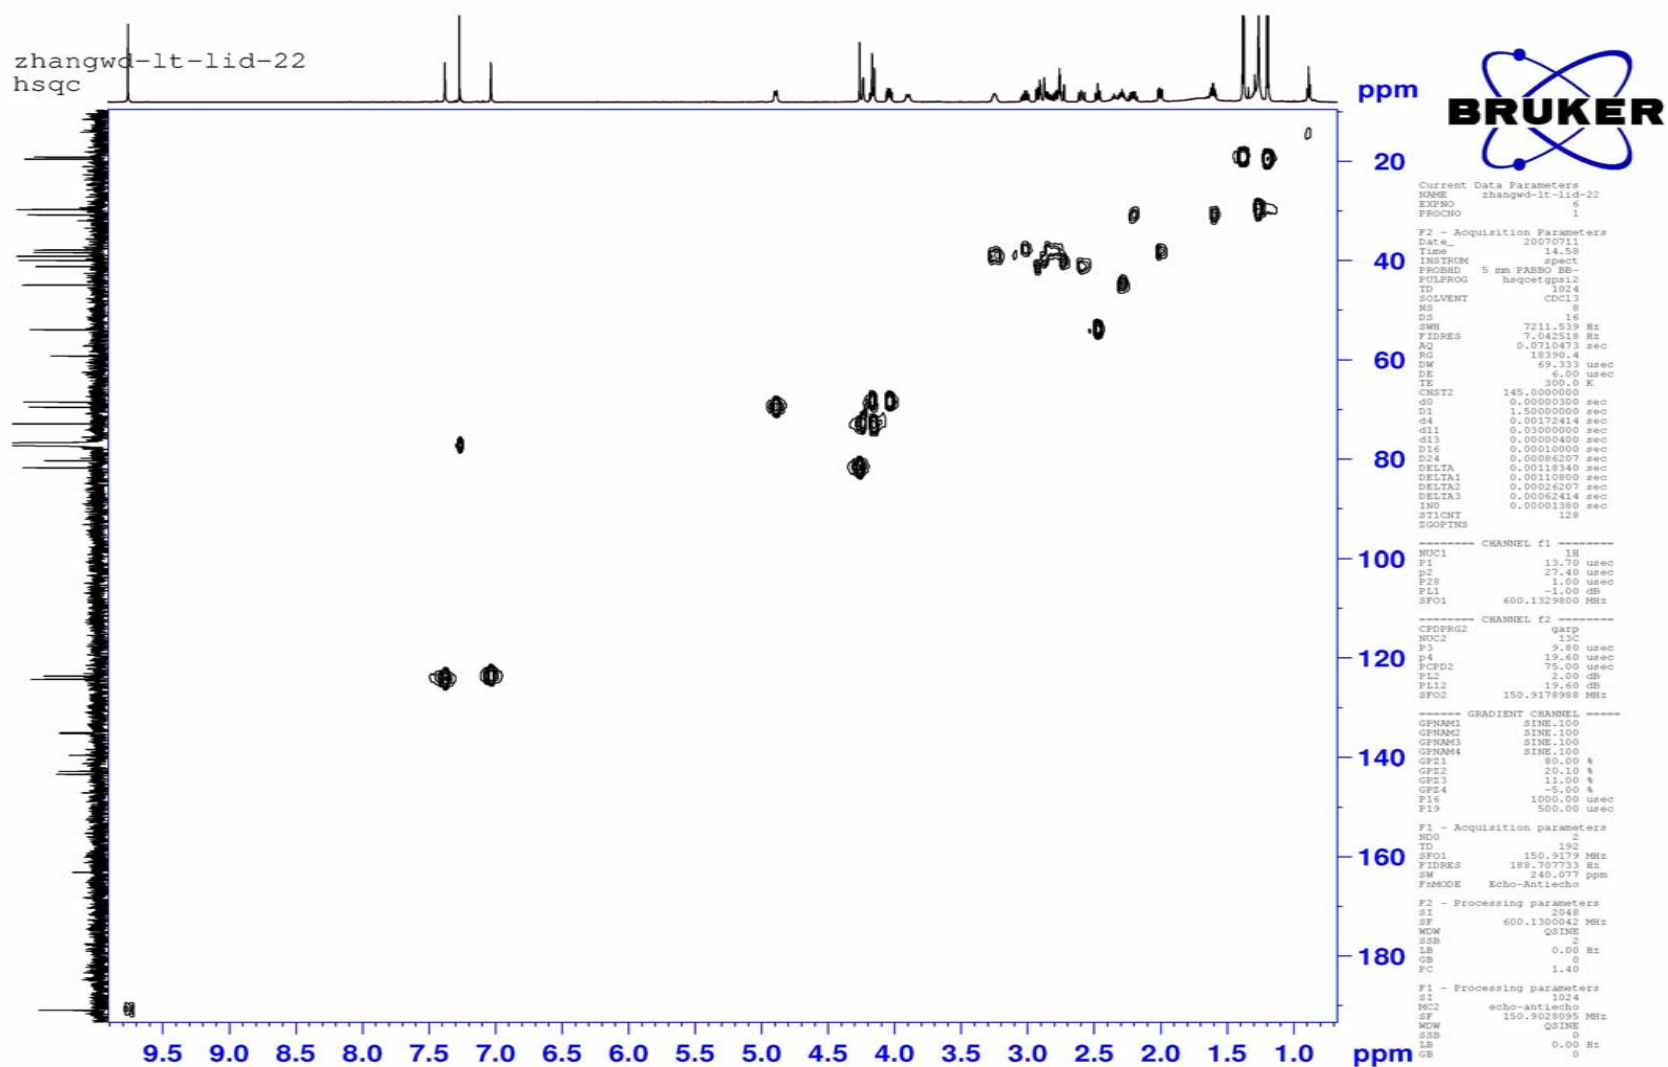

Figure S6  $^1\text{H}$ - $^1\text{H}$  COSY NMR Spectrum of incarviateone A (1) in  $\text{CDCl}_3$

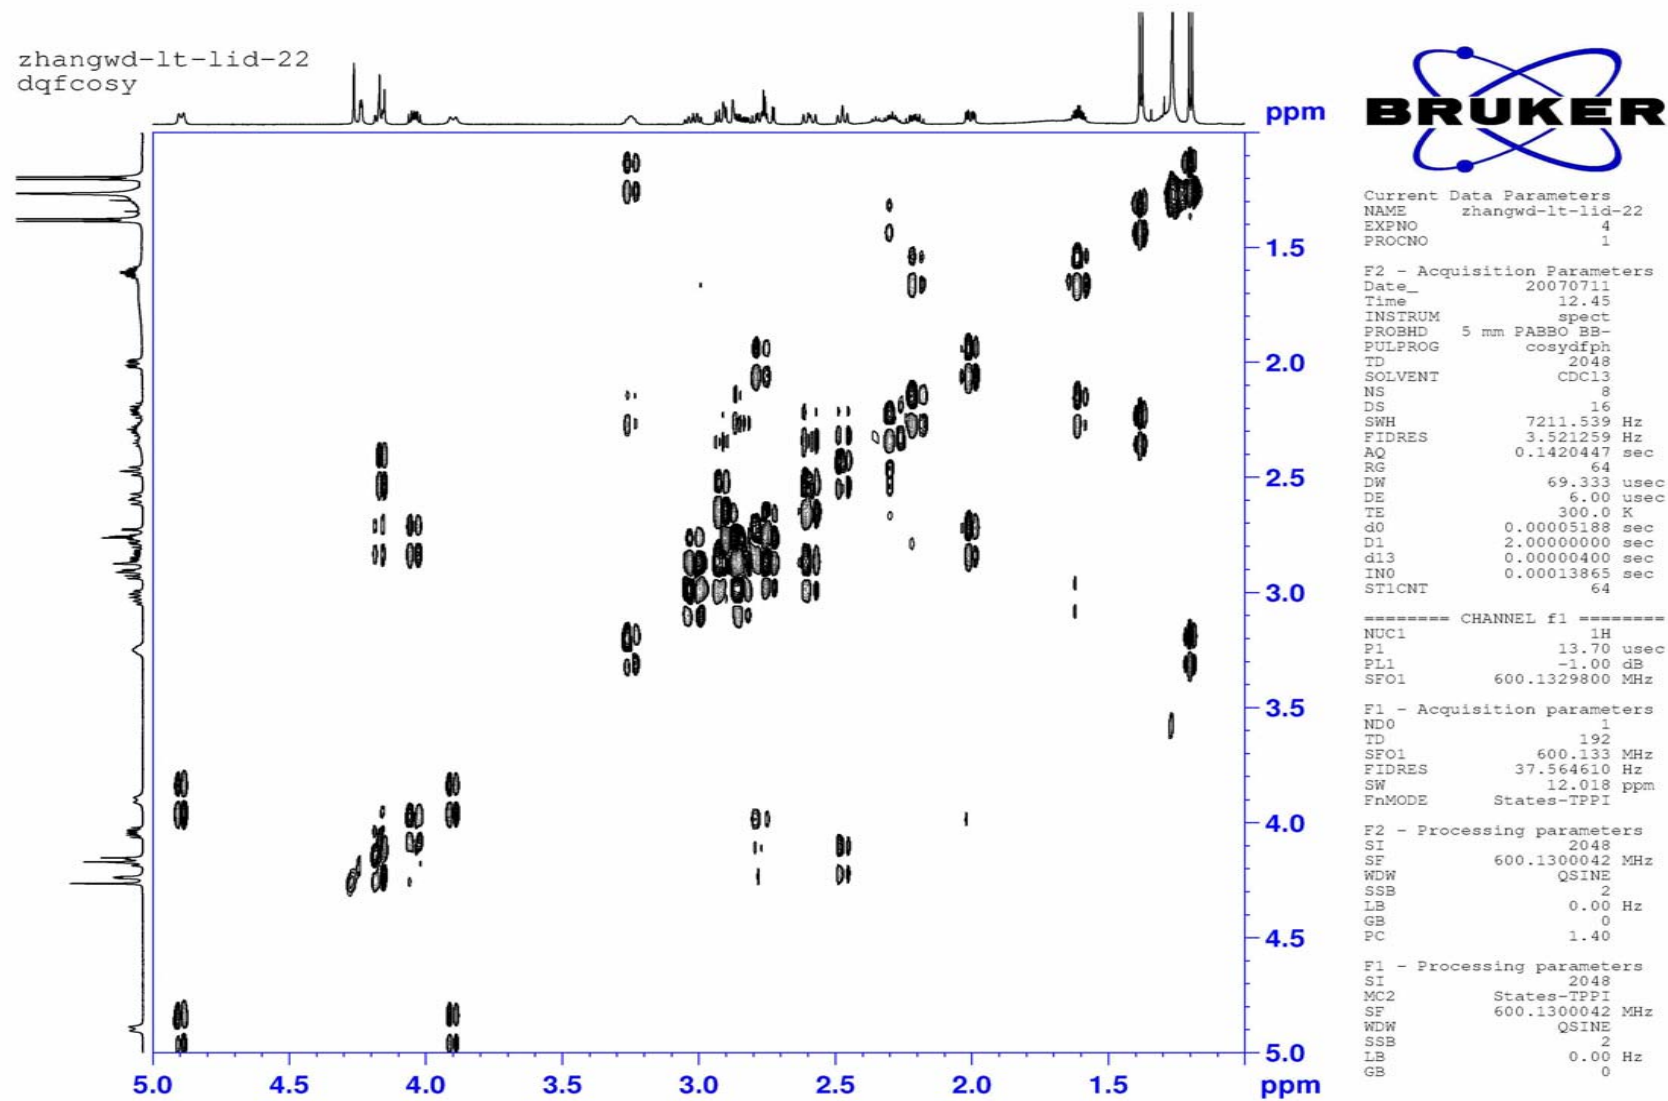



Figure S7 HMBC NMR Spectrum of incarviateone A (1) in CDCl<sub>3</sub>

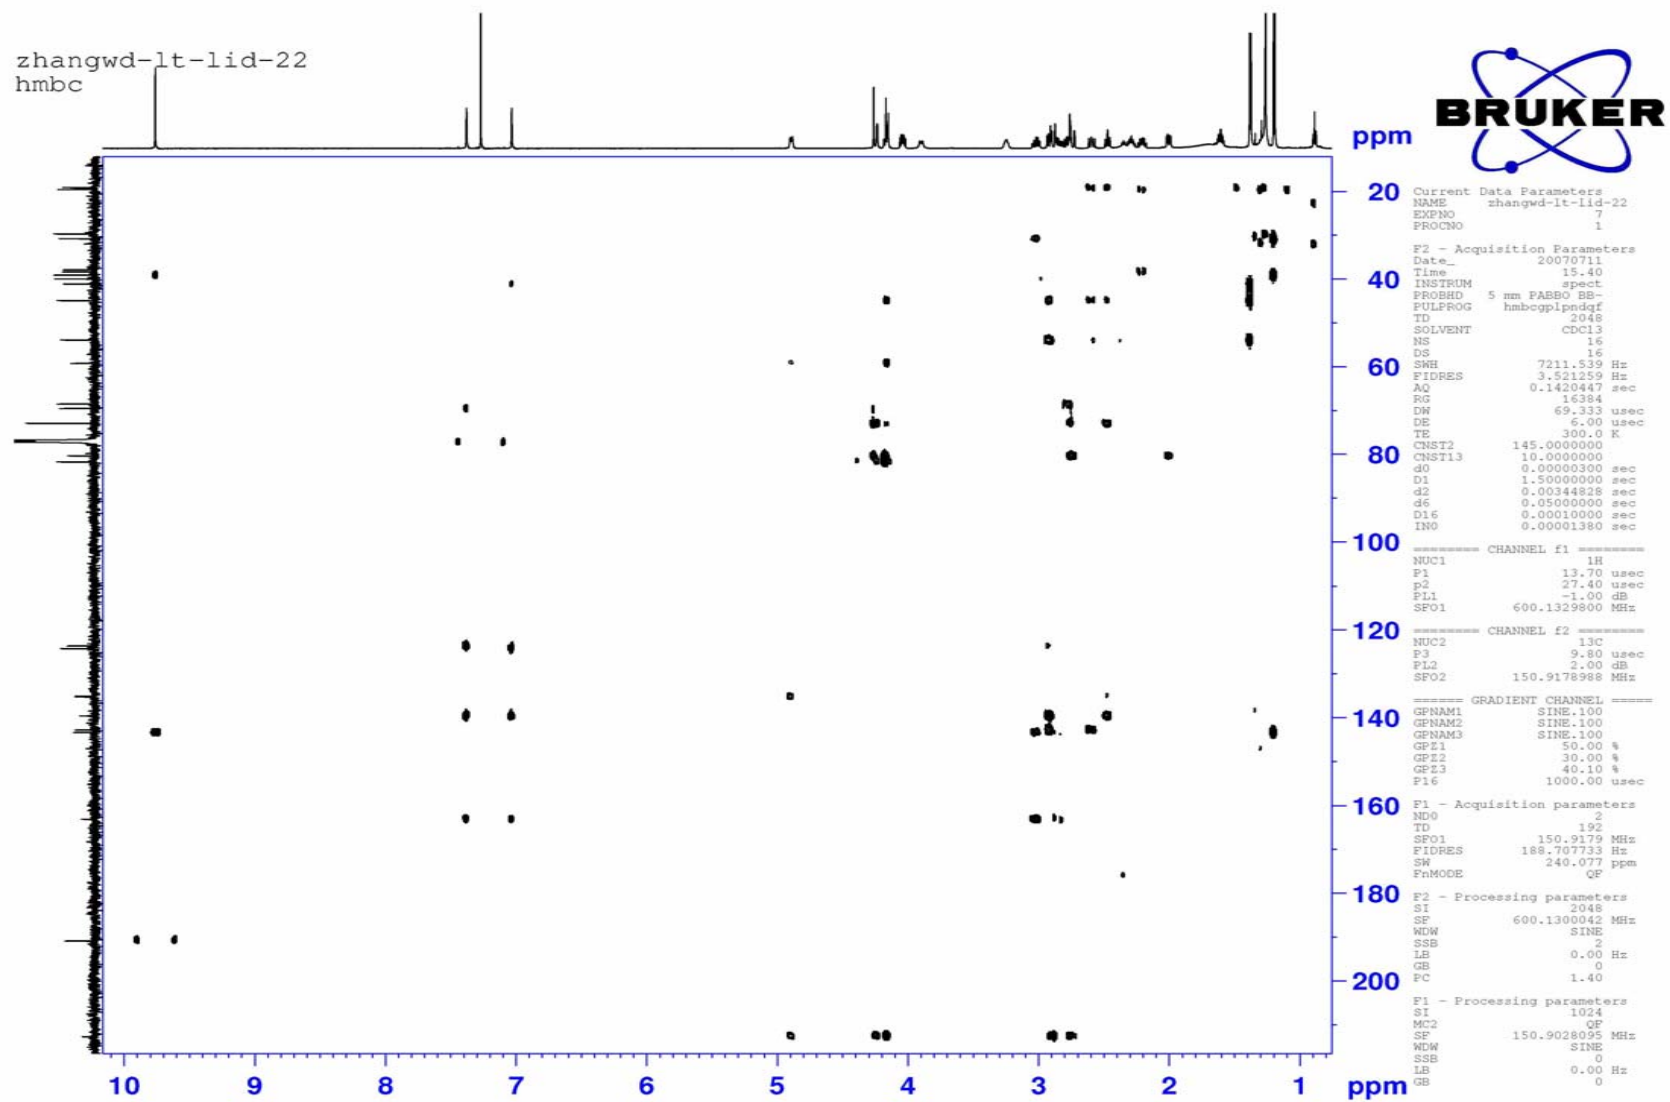

Figure S8 NOESY NMR Spectrum of incarviateone A (1) in CDCl<sub>3</sub>

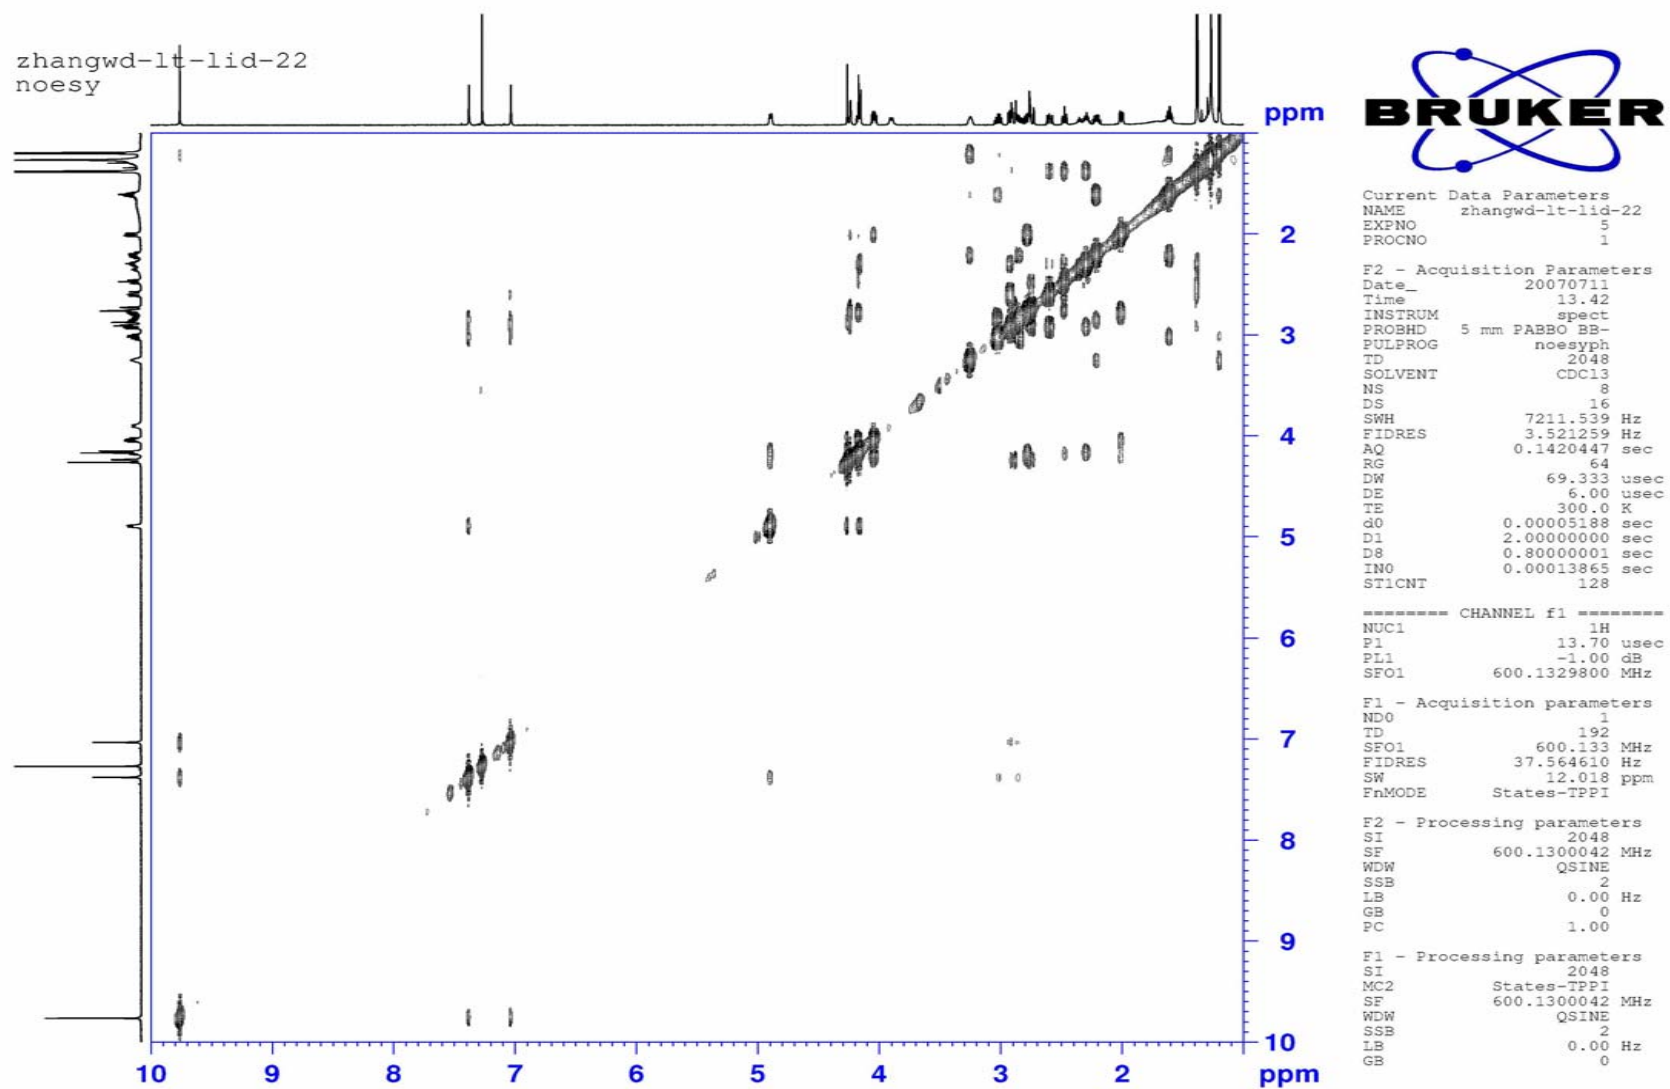

**Complete citation of reference 19**

Gaussian 03, Revision D.01,

M. J. Frisch, G. W. Trucks, H. B. Schlegel, G. E. Scuseria, M. A. Robb, J. R. Cheeseman, J. A. Montgomery, Jr., T. Vreven, K. N. Kudin, J. C. Burant, J. M. Millam, S. S. Iyengar, J. Tomasi, V. Barone, B. Mennucci, M. Cossi, G. Scalmani, N. Rega, G. A. Petersson, H. Nakatsuji, M. Hada, M. Ehara, K. Toyota, R. Fukuda, J. Hasegawa, M. Ishida, T. Nakajima, Y. Honda, O. Kitao, H. Nakai, M. Klene, X. Li, J. E. Knox, H. P. Hratchian, J. B. Cross, V. Bakken, C. Adamo, J. Jaramillo, R. Gomperts, R. E. Stratmann, O. Yazyev, A. J. Austin, R. Cammi, C. Pomelli, J. W. Ochterski, P. Y. Ayala, K. Morokuma, G. A. Voth, P. Salvador, J. J. Dannenberg, V. G. Zakrzewski, S. Dapprich, A. D. Daniels, M. C. Strain, O. Farkas, D. K. Malick, A. D. Rabuck, K. Raghavachari, J. B. Foresman, J. V. Ortiz, Q. Cui, A. G. Baboul, S. Clifford, J. Cioslowski, B. B. Stefanov, G. Liu, A. Liashenko, P. Piskorz, I. Komaromi, R. L. Martin, D. J. Fox, T. Keith, M. A. Al-Laham, C. Y. Peng, A. Nanayakkara, M. Challacombe, P. M. W. Gill, B. Johnson, W. Chen, M. W. Wong, C. Gonzalez, and J. A. Pople, Gaussian, Inc., Wallingford CT, 2004.

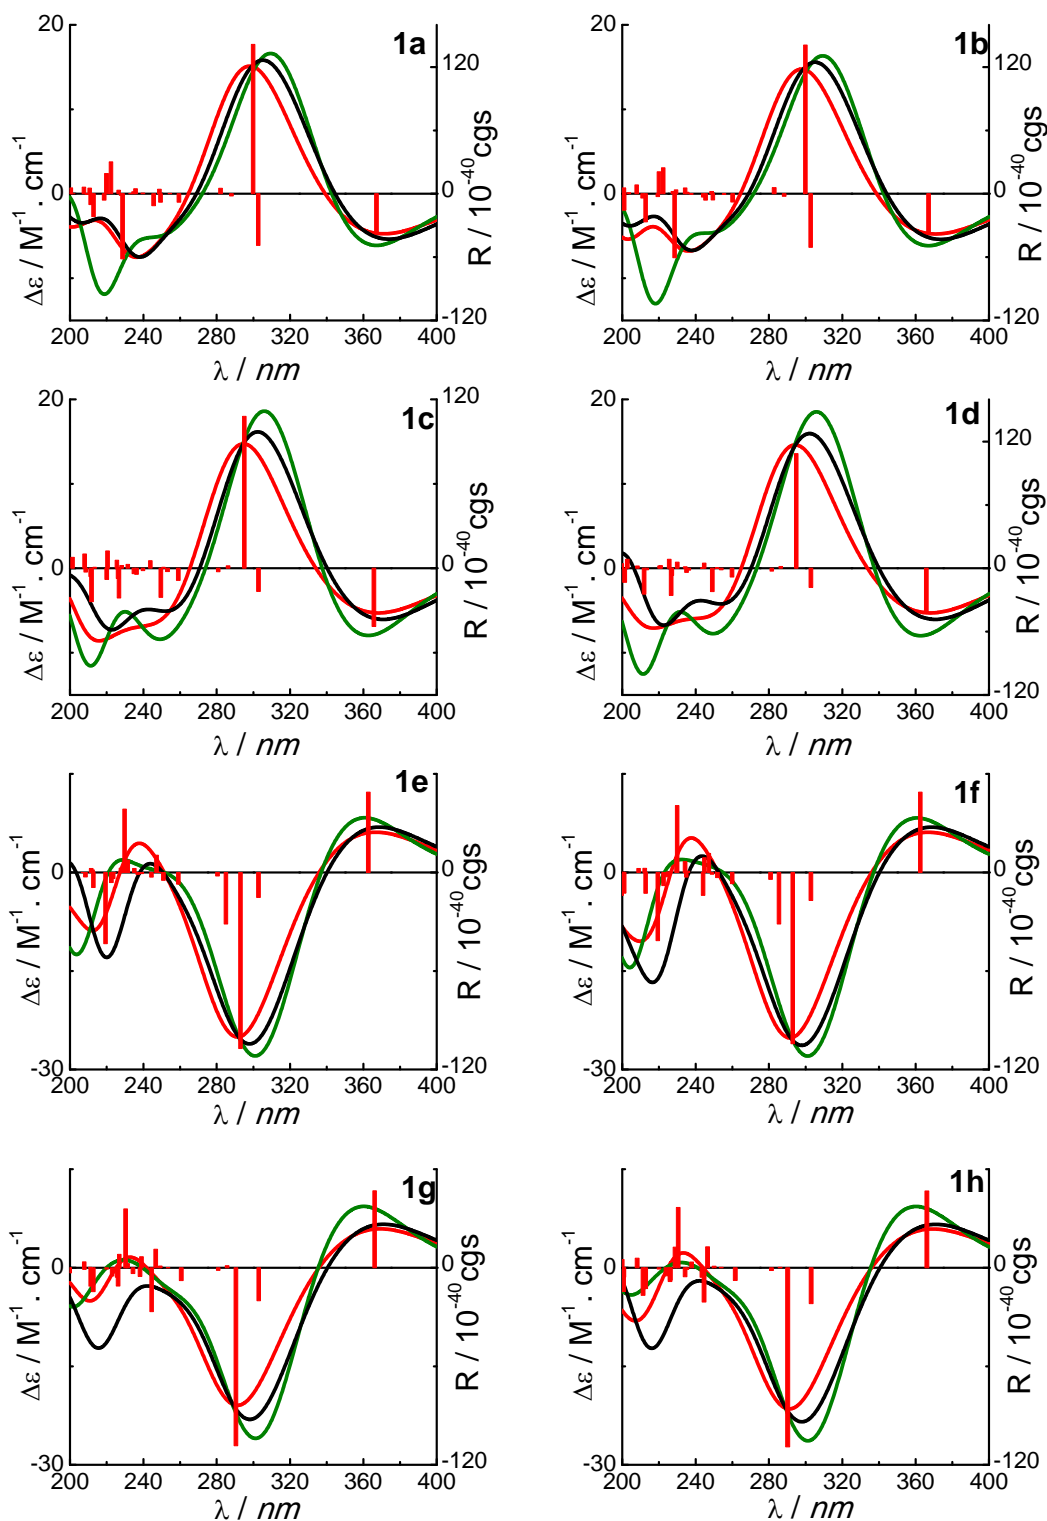

**Figure S9** Calculated ECD spectra of individual conformer of **1a-1h** (red —, at the B3LYP/6-31G\*\* level in the gas phase; black —, at the B3LYP/6-311++G\*\*//B3LYP/6-31G\*\* level in the gas phase; olive —, at the B3LYP-SCRF/6-31G\*\*//B3LYP/6-31G\*\* level with the COSMO model in MeOH)

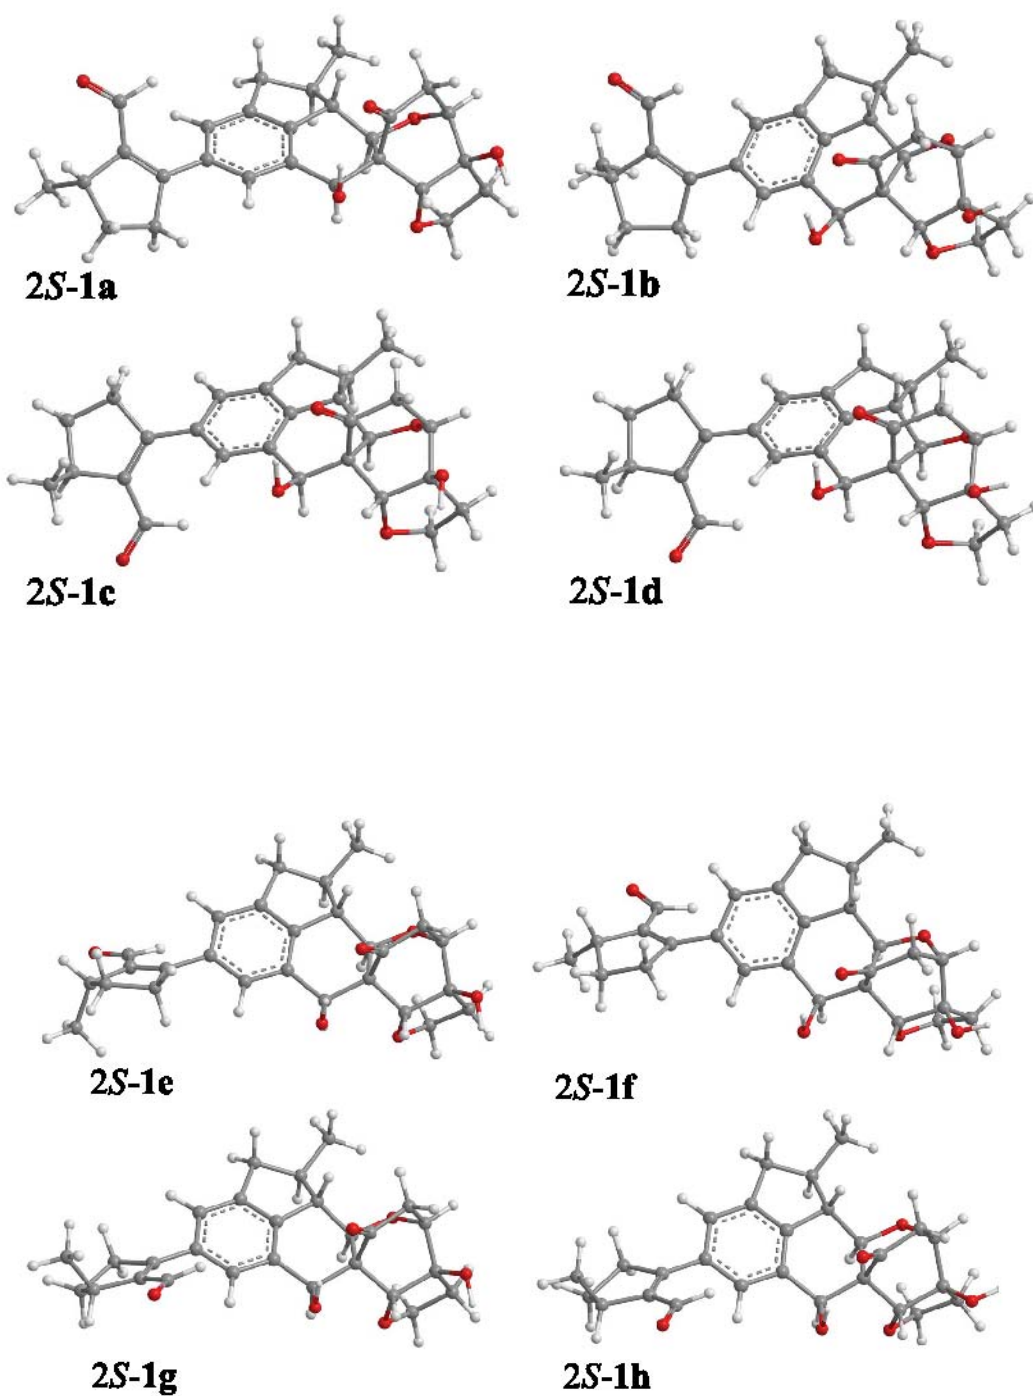

**Figure S10** Optimized geometries of predominant conformers of 2S-1 in the gas phase at the B3LYP/6-31G\*\* level.

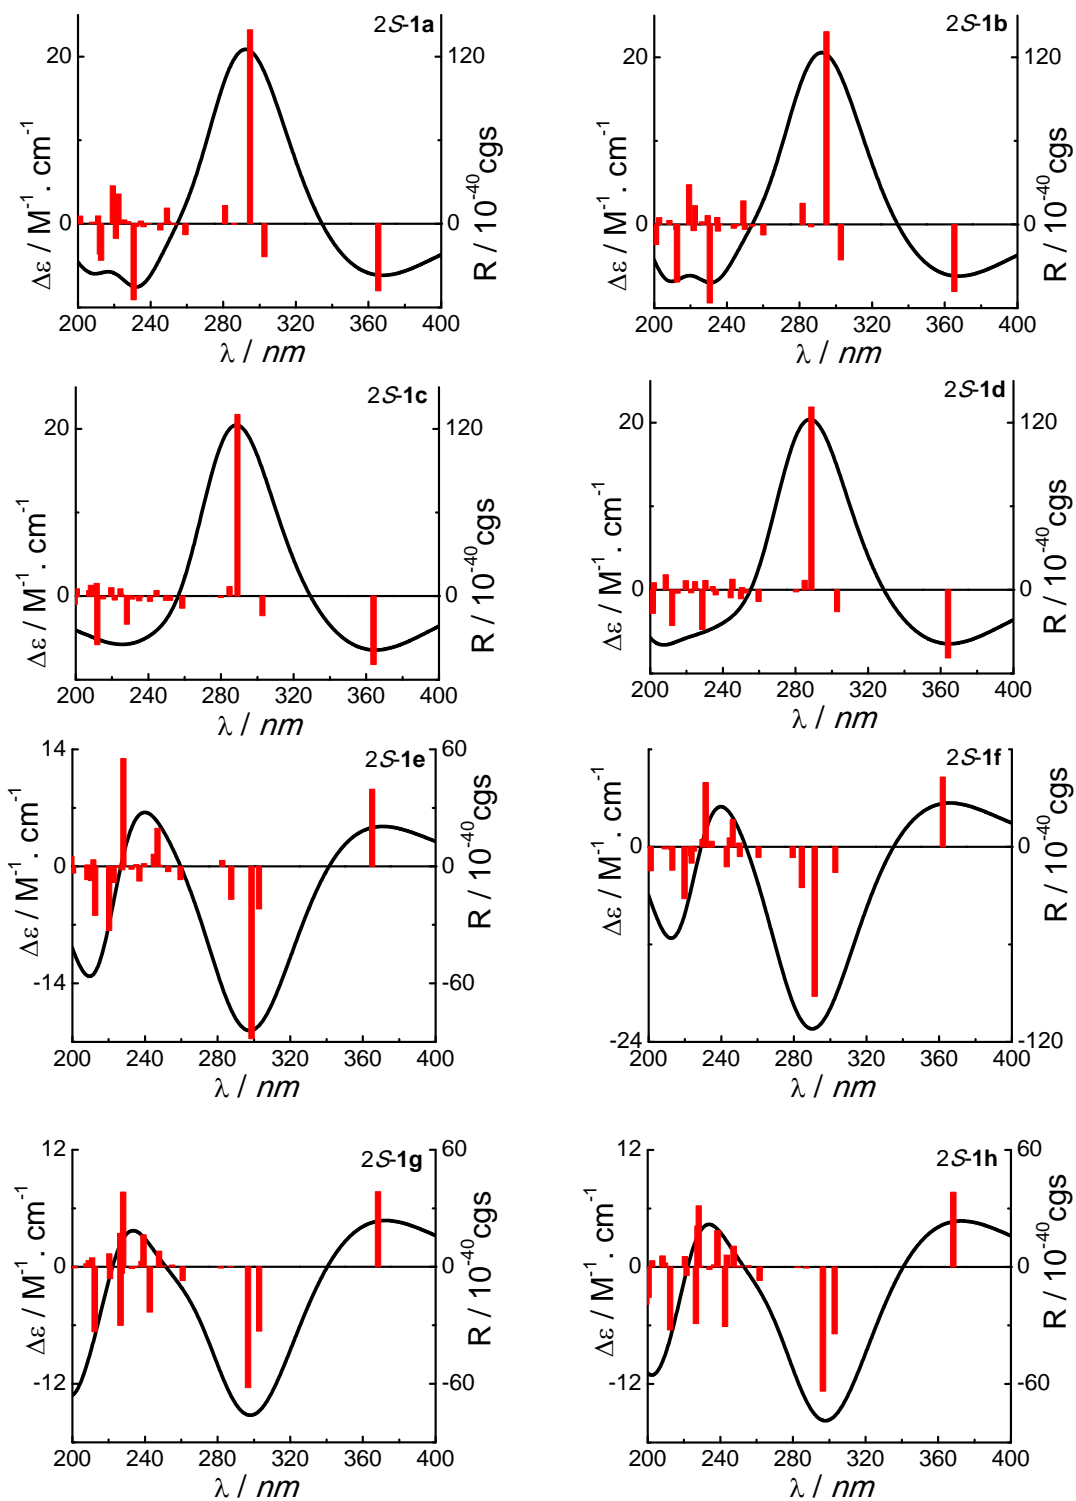

**Figure S11** Calculated ECD spectra of individual conformer of 2S-1 at the B3LYP/6-31G\*\* level in the gas phase.

**Table S1** Important dihedral angles of optimized conformers of **1** in the gas phase at the B3LYP/6-31G\*\* level

| Species         | <b>1a</b> | <b>1b</b> | <b>1c</b> | <b>1d</b> | <b>1e</b> | <b>1f</b> | <b>1g</b> | <b>1h</b> |
|-----------------|-----------|-----------|-----------|-----------|-----------|-----------|-----------|-----------|
| O-C-26-C-1-C-5  | 178       | 178       | 179       | 180       | -175      | -175      | -176      | -176      |
| C-1-C-5-C-6-C-7 | 143       | 143       | -44       | -44       | -138      | -138      | 43        | 43        |
| HO-C-19-C-18    | 176       | -69       | 176       | -70       | 177       | -69       | 176       | -69       |

**Table S2** Conformational analysis of **1**

| Species   | Gas phase      |                               |                |                               |                |                               |                |                               | MeOH                        |                                |
|-----------|----------------|-------------------------------|----------------|-------------------------------|----------------|-------------------------------|----------------|-------------------------------|-----------------------------|--------------------------------|
|           | E <sup>a</sup> | P <sub>E</sub> % <sup>b</sup> | E <sup>c</sup> | P <sub>E</sub> % <sup>d</sup> | G <sup>e</sup> | P <sub>G</sub> % <sup>f</sup> | E <sup>g</sup> | P <sub>E</sub> % <sup>h</sup> | E <sub>s</sub> <sup>i</sup> | P <sub>Es</sub> % <sup>j</sup> |
| <b>1a</b> | 0.12           | 22.8                          | 0.24           | 19.9                          | 0.44           | 16.1                          | 0.22           | 23.5                          | 0.40                        | 9.8                            |
| <b>1b</b> | 0.79           | 7.4                           | 0.89           | 6.6                           | 1.08           | 5.4                           | 1.16           | 4.8                           | 0.11                        | 15.8                           |
| <b>1c</b> | 0.66           | 9.2                           | 0.66           | 9.8                           | 0.69           | 10.6                          | 0.75           | 9.6                           | 0.72                        | 5.7                            |
| <b>1d</b> | 1.38           | 2.7                           | 1.36           | 3.0                           | 1.35           | 3.5                           | 1.78           | 1.7                           | 0.51                        | 8.1                            |
| Subtotal  |                | 42.1                          |                | 39.3                          |                | 35.6                          |                | 39.6                          |                             | 39.4                           |
| <b>1e</b> | 0.00           | 27.9                          | 0.00           | 29.7                          | 0.00           | 33.9                          | 0.00           | 33.9                          | 0.28                        | 11.9                           |
| <b>1f</b> | 0.67           | 9.0                           | 0.68           | 9.5                           | 0.67           | 10.9                          | 0.94           | 7.0                           | 0.06                        | 17.5                           |
| <b>1g</b> | 0.32           | 16.2                          | 0.34           | 16.6                          | 0.48           | 15.0                          | 0.43           | 16.5                          | 0.28                        | 11.9                           |
| <b>1h</b> | 1.05           | 4.8                           | 1.06           | 5.0                           | 1.19           | 4.6                           | 1.43           | 3.1                           | 0.00                        | 19.2                           |
| Subtotal  |                | 57.9                          |                | 60.8                          |                | 64.4                          |                | 60.5                          |                             | 60.5                           |

<sup>a,c,e</sup>Relative energy, relative energy with Zero Point Energy (ZPE), and relative Gibbs free energy at the B3LYP/6-31G\*\* level in the gas phase, respectively (kcal/mol). <sup>b,d,f</sup>Conformational distribution calculated by using the respective parameters above at the B3LYP/6-31G\*\* level in the gas phase. <sup>g,h</sup>Relative energy (kcal/mol) and conformational distribution at the B3LYP/6-311++G\*\*//B3LYP/6-31G\*\* level in the gas phase, respectively; <sup>i,j</sup>Relative energy (kcal/mol) and conformational distribution in methanol solution at the B3LYP-SCRF/6-31G\*\*//B3LYP/6-31G\*\* level with the COSMO model, respectively.

**Table S3.** Important Thermodynamic Parameters of **1** (au)

| Species   | In the Gas   |              |              |              |              | In MeOH        |
|-----------|--------------|--------------|--------------|--------------|--------------|----------------|
|           | E            | E'=E+ZPE     | H            | G            | E''          | E <sub>s</sub> |
| <b>1a</b> | -1498.296535 | -1497.768721 | -1497.739677 | -1497.825833 | -1498.657828 | -1498.322158   |
| <b>1b</b> | -1498.295473 | -1497.767680 | -1497.738616 | -1497.824807 | -1498.656329 | -1498.322607   |
| <b>1c</b> | -1498.295684 | -1497.768050 | -1497.738953 | -1497.825438 | -1498.65698  | -1498.321643   |
| <b>1d</b> | -1498.294522 | -1497.766938 | -1497.737807 | -1497.824379 | -1498.655341 | -1498.32197    |
| <b>1e</b> | -1498.296728 | -1497.769099 | -1497.739972 | -1497.826534 | -1498.658175 | -1498.322339   |
| <b>1f</b> | -1498.295656 | -1497.768020 | -1497.738884 | -1497.825467 | -1498.656678 | -1498.322700   |
| <b>1g</b> | -1498.296214 | -1497.768553 | -1497.739463 | -1497.825762 | -1498.657495 | -1498.322340   |
| <b>1h</b> | -1498.295056 | -1497.767409 | -1497.738304 | -1497.824639 | -1498.655903 | -1498.322788   |

*E, E', H, G: total energy, total energy with ZPE, enthalpy and Gibbs free energy at B3LYP/6-31G\* level in the gas phase; E'': single point energy at B3LYP/6-311++G\*\*//B3LYP/6-31G\*\* level in the gas phase; E<sub>s</sub>: single point energy in methanol solution at B3LYP-SCRF/6-31G\*\*//B3LYP/6-31G\*\* level with COSMO model*

**Table S4** Key transitions and their related rotatory and oscillator strengths of conformer **1e** at the B3LYP/6-31G\*\* level in the gas phase

| Transition | $\Delta E$ (eV) | $\lambda$ (nm) | $f$   | $R^{\text{vel}}$ | $R^{\text{len}}$ |
|------------|-----------------|----------------|-------|------------------|------------------|
| 119→121    | 3.42            | 363            | 0.012 | 45.3             | 48.9             |
| 117→122    | 4.09            | 303            | 0.001 | -15.9            | -15.2            |
| 120→121    | 4.23            | 293            | 0.348 | -102.2           | -107.2           |
| 120→122    | 4.35            | 285            | 0.041 | -30.5            | -31.3            |
| 120→123    | 5.02            | 247            | 0.034 | 12.3             | 10.5             |
| 119→123    | 5.40            | 230            | 0.033 | 36.3             | 38.6             |
| 119→124    | 5.65            | 219            | 0.041 | -39.6            | -43.3            |

*E: excited energy;  $\lambda$ : wavelength;  $f$ : oscillator strength;  $R^{\text{vel}}$ : rotatory strength in velocity form( $10^{-40}$  cgs);  $R^{\text{len}}$ : rotatory strength in length form( $10^{-40}$  cgs).*



**Table S5** Conformational analysis of 2S-1

| Species  | In the Gas     |                               |                |                                |                |                               | In MeOH                     |                                |
|----------|----------------|-------------------------------|----------------|--------------------------------|----------------|-------------------------------|-----------------------------|--------------------------------|
|          | E <sup>a</sup> | P <sub>E</sub> % <sup>b</sup> | E <sup>c</sup> | P <sub>E</sub> '% <sup>d</sup> | G <sup>e</sup> | P <sub>G</sub> % <sup>f</sup> | E <sub>s</sub> <sup>g</sup> | P <sub>Es</sub> % <sup>h</sup> |
| 2S-1a    | 0.00           | 30.6                          | 0.00           | 29.9                           | 0.00           | 30.7                          | 0.29                        | 14.7                           |
| 2S-1b    | 0.67           | 9.9                           | 0.66           | 9.8                            | 0.65           | 10.3                          | 0.00                        | 24.1                           |
| 2S-1c    | 0.48           | 13.6                          | 0.41           | 15.0                           | 0.38           | 16.0                          | 0.56                        | 9.4                            |
| 2S-1d    | 1.21           | 4.0                           | 1.15           | 4.3                            | 1.09           | 4.9                           | 0.32                        | 14.1                           |
| subtotal |                | 58.1                          |                | 59.0                           |                | 61.9                          |                             | 62.3                           |
| 2S-1e    | 0.28           | 18.9                          | 0.33           | 17.1                           | 0.39           | 15.9                          | 0.69                        | 7.5                            |
| 2S-1f    | 1.17           | 4.3                           | 1.10           | 4.7                            | 1.05           | 5.2                           | 0.78                        | 6.4                            |
| 2S-1g    | 0.45           | 14.4                          | 0.41           | 14.8                           | 0.51           | 13.0                          | 0.55                        | 9.5                            |
| 2S-1h    | 1.17           | 4.3                           | 1.13           | 4.4                            | 1.21           | 4.0                           | 0.32                        | 14.1                           |
| subtotal |                | 41.9                          |                | 41.0                           |                | 38.1                          |                             | 37.5                           |

<sup>a,c,e</sup>Relative energy, relative energy with ZPE, and relative Gibbs free energy at B3LYP/6-31G\*\* level in the gas phase, respectively (kcal/mol). <sup>b,d,f</sup>Conformational distribution calculated by using the respective parameters above at B3LYP/6-31G\*\* level in the gas phase. <sup>g,h</sup>Relative energy (kcal/mol) and conformational distribution in methanol solution at B3LYP-SCRF/6-31G\*\*//B3LYP/6-31G\*\* level with COSMO model, respectively.

**Table S6.** Important Thermodynamic Parameters of 2S-1 (au)

| Species | In the Gas   |              |              |              |              | In MeOH        |
|---------|--------------|--------------|--------------|--------------|--------------|----------------|
|         | E            | E'=E+ZPE     | H            | G            | E''          | E <sub>s</sub> |
| 2S-1a   | -1498.296535 | -1497.768721 | -1497.739677 | -1497.825833 | -1498.657828 | -1498.322158   |
| 2S-1b   | -1498.295473 | -1497.767680 | -1497.738616 | -1497.824807 | -1498.656329 | -1498.322607   |
| 2S-1c   | -1498.295684 | -1497.768050 | -1497.738953 | -1497.825438 | -1498.65698  | -1498.321643   |
| 2S-1d   | -1498.294522 | -1497.766938 | -1497.737807 | -1497.824379 | -1498.655341 | -1498.32197    |
| 2S-1e   | -1498.296728 | -1497.769099 | -1497.739972 | -1497.826534 | -1498.658175 | -1498.322339   |
| 2S-1f   | -1498.295656 | -1497.768020 | -1497.738884 | -1497.825467 | -1498.656678 | -1498.322700   |
| 2S-1g   | -1498.296214 | -1497.768553 | -1497.739463 | -1497.825762 | -1498.657495 | -1498.322340   |
| 2S-1h   | -1498.295056 | -1497.767409 | -1497.738304 | -1497.824639 | -1498.655903 | -1498.322788   |

E, E', H, G: total energy, total energy with ZPE, enthalpy and Gibbs free energy at B3LYP/6-31G\*\* level in the gas phase; E'': single point energy at B3LYP/6-311++G\*\*//B3LYP/6-31G\*\* level in the gas phase; E<sub>s</sub>: single point energy in methanol solution at B3LYP-SCRF/6-31G\*\*//B3LYP/6-31G\*\* level with COSMO model

**Table S7** Important dihedral angles of optimized conformers of 2S-1 in the gas phase at B3LYP/6-31G\*\* level

| species         | 2S-1a | 2S-1b | 2S-1c | 2S-1d | 2S-1e | 2S-1f | 2S-1g | 2S-1h |
|-----------------|-------|-------|-------|-------|-------|-------|-------|-------|
| O-C-26-C-1-C-5  | 175   | 175   | 176   | 176   | -178  | -168  | -179  | -179  |
| C-1-C-5-C-6-C-7 | 143   | 143   | -43   | -44   | -138  | -136  | 43    | 43    |
| HO-C-19-C-18    | 177   | -69   | 177   | -70   | 177   | -69   | 176   | -69   |
